# Supplementary material
Source: MDPI journal article supplement (https://www.mdpi.com/2073-4441/15/3/408)
Supplement: s1 [file s1]

## Supplementary materials

Table S1: System Performance after the start-up for both scenarios.

| Day | Scenario 1 |     |     |                 |                 | Scenario 2 |     |     |                 |                 |
|-----|------------|-----|-----|-----------------|-----------------|------------|-----|-----|-----------------|-----------------|
|     | TSS        | BOD | COD | NH <sub>4</sub> | NO <sub>3</sub> | TSS        | BOD | COD | NH <sub>4</sub> | NO <sub>3</sub> |
| 13  | 5          | 8   | 15  | 0.7             | 6               | 6          | 4   | 26  | 0.2             | 5               |
| 14  | 6          | 7   | 16  | 0.8             | 5               | 6          | 4   | 25  | 0.3             | 6               |
| 15  | 5          | 9   | 15  | 0.6             | 4               | 7          | 5   | 27  | 0.3             | 4               |
| 16  | 5          | 8   | 16  | 0.7             | 6               | 7          | 4   | 28  | 0.2             | 5               |
| 17  | 6          | 6   | 13  | 0.8             | 6               | 6          | 4   | 25  | 0.3             | 5               |
| 18  | 8          | 8   | 16  | 0.6             | 5               | 7          | 6   | 25  | 0.2             | 5               |
| 19  | 5          | 5   | 15  | 0.5             | 4               | 8          | 5   | 26  | 0.3             | 4               |
| 20  | 4          | 8   | 18  | 0.6             | 5               | 5          | 4   | 24  | 0.2             | 5               |
| 21  | 7          | 9   | 16  | 0.7             | 3               | 3          | 4   | 26  | 0.3             | 3               |
| 22  | 8          | 8   | 15  | 0.6             | 4               | 6          | 9   | 26  | 0.2             | 3               |
| 23  | 6          | 6   | 14  | 0.4             | 5               | 5          | 7   | 22  | 0.3             | 9               |
| 24  | 5          | 9   | 16  | 0.8             | 6               | 6          | 6   | 25  | 0.3             | 5               |
| 25  | 4          | 8   | 15  | 0.7             | 6               | 5          | 7   | 21  | 0.2             | 5               |
| 26  | 5          | 9   | 15  | 0.7             | 6               | 4          | 5   | 23  | 0.3             | 3               |
| 27  | 5          | 6   | 14  | 0.7             | 5               | 3          | 3   | 24  | 0.2             | 5               |
| 28  | 6          | 8   | 15  | 0.5             | 6               | 5          | 4   | 27  | 0.3             | 7               |
| 29  | 5          | 5   | 14  | 0.7             | 5               | 6          | 6   | 24  | 0.2             | 8               |
| 30  | 7          | 9   | 15  | 0.8             | 6               | 6          | 5   | 25  | 0.3             | 6               |
| 31  | 5          | 7   | 15  | 0.9             | 4               | 5          | 4   | 28  | 0.2             | 5               |
| 32  | 8          | 8   | 16  | 0.7             | 5               | 4          | 3   | 24  | 0.3             | 6               |
| 33  | 5          | 6   | 15  | 0.7             | 5               | 7          | 4   | 20  | 0.2             | 5               |
| 34  | 6          | 8   | 14  | 0.6             | 6               | 7          | 5   | 25  | 0.3             | 4               |
| 35  | 5          | 7   | 15  | 0.7             | 4               | 5          | 6   | 26  | 0.2             | 3               |
| 36  | 5          | 8   | 14  | 0.6             | 6               | 6          | 6   | 26  | 0.3             | 6               |
| 37  | 6          | 6   | 15  | 0.5             | 5               | 4          | 5   | 22  | 0.2             | 5               |
| 38  | 5          | 8   | 13  | 0.7             | 6               | 6          | 4   | 28  | 0.3             | 4               |
| 39  | 5          | 8   | 15  | 0.6             | 5               | 6          | 6   | 26  | 0.2             | 4               |
| 40  | 7          | 5   | 12  | 0.7             | 6               | 5          | 5   | 21  | 0.3             | 5               |
| 41  | 5          | 8   | 15  | 0.8             | 5               | 6          | 4   | 24  | 0.3             | 6               |
| 42  | 5          | 6   | 14  | 0.8             | 6               | 4          | 4   | 28  | 0.2             | 5               |
| 43  | 5          | 8   | 15  | 0.7             | 6               | 6          | 4   | 23  | 0.3             | 5               |
